# Supplementary material
Source: PubMed Central journal article supplement (PMC5053801)
Supplement: CJN.13091215SupplementaryData.pdf [file CJN.13091215SupplementaryData.pdf]

Supplemental Table 1. Pathology studies of collapsing patients

|                                 | All patients<br>(n=59) | No<br>immunosuppressive<br>therapy (n=35) | Immunosuppressive<br>therapy (n=19) | p    | Response to therapy<br>(n=23) | No response to<br>therapy (n=12) | p    |
|---------------------------------|------------------------|-------------------------------------------|-------------------------------------|------|-------------------------------|----------------------------------|------|
| Segmental collapsing lesion (%) | 10.0 (3.3-16.7)        | 6.7 (0-14.3)                              | 12.0 (4.5-20.0)                     | 0.15 | 12.5 (5.9-18.2)               | 10.6 (3.5-16.7)                  | 0.43 |
| Global collapsing lesion (%)    | 7.1 (0-15.6)           | 9.1 (4.8-33.3)                            | 4.8 (0-12.5)                        | 0.05 | 4.8 (0-9.1)                   | 9.8 (2.0-17.5)                   | 0.14 |
| NOS score (0-4) <sup>a</sup>    | 0.7±0.7                | 0.6±0.6                                   | 0.8±0.7                             | 0.45 | 0.9±0.6                       | 0.8±0.9                          | 0.76 |
| IFTA score (0-4)                | 1.5±0.7                | 1.6±0.8                                   | 1.4±0.7                             | 0.56 | 1.2±0.5                       | 1.6±0.8                          | 0.13 |

Normally distributed continuous variables expressed as mean ± standard deviation; Not normally distributed continuous variables expressed as median (interquartile range). NOS, not otherwise specified; IFTA, interstitial fibrosis/tubular atrophy.

<sup>a</sup>This score describes segmental and global NOS lesions on a scale of 0+ (none), 1+ (1-25%), 2+ (26-50%), 3+ (51-75%) or 4+(>75%) glomeruli with the lesion.

Supplemental Table 2. Pathology studies of NOS patients

|                                | All patients<br>(n=122) | No<br>immunosuppressive<br>therapy (n=36) | Immunosuppressive<br>therapy (n=85) | p                | Response to<br>therapy (n=71) | No response to<br>therapy (n=40) | p    |
|--------------------------------|-------------------------|-------------------------------------------|-------------------------------------|------------------|-------------------------------|----------------------------------|------|
| Segmental sclerosis lesion (%) | 11.4 (6.3-20)           | 11.9 (6.5-21.6)                           | 11.1 (6.1-18.8)                     | 0.65             | 9.3 (5.4-15.8)                | 15.5 (6.5-23.6)                  | 0.22 |
| Global sclerosis lesion (%)    | 6.8 (0-25.0)            | 14.0 (5.2-29.8)                           | 5.9 (0-19.0)                        | <b>0.03</b>      | 6.3 (0-25)                    | 8.3 (3.0-26.1)                   | 0.24 |
| IFTA score (0-4)               | 1.2±1.0                 | 1.6±1.1                                   | 1.1±0.9                             | <b>0.02</b>      | 1.0±0.8                       | 1.4±1.1                          | 0.06 |
| Vascular score (0-4)           | 1.0±1.1                 | 1.5±1.1                                   | 0.8±1.0                             | <b>&lt;0.001</b> | 0.7±0.9                       | 1.2±1.2                          | 0.05 |

Normally distributed continuous variables expressed as mean ± standard deviation; Not normally distributed continuous variables expressed as median (interquartile range). NOS, not otherwise specified; IFTA, interstitial fibrosis/tubular atrophy.
